# Supplementary material for: The presence of alpha-catenin in the VE-cadherin complex is required for efficient transendothelial migration of leukocytes
Source: PubMed Central journal article supplement — Int J Biol Sci. 2009 Nov 9;5(7):695–705. doi: 10.7150/ijbs.5.695 (PMC2777273; doi:10.7150/ijbs.5.695), 2009-11-09
Supplement: ijbsv05p0695s3.pdf [file ijbsv05p0695s3.pdf]

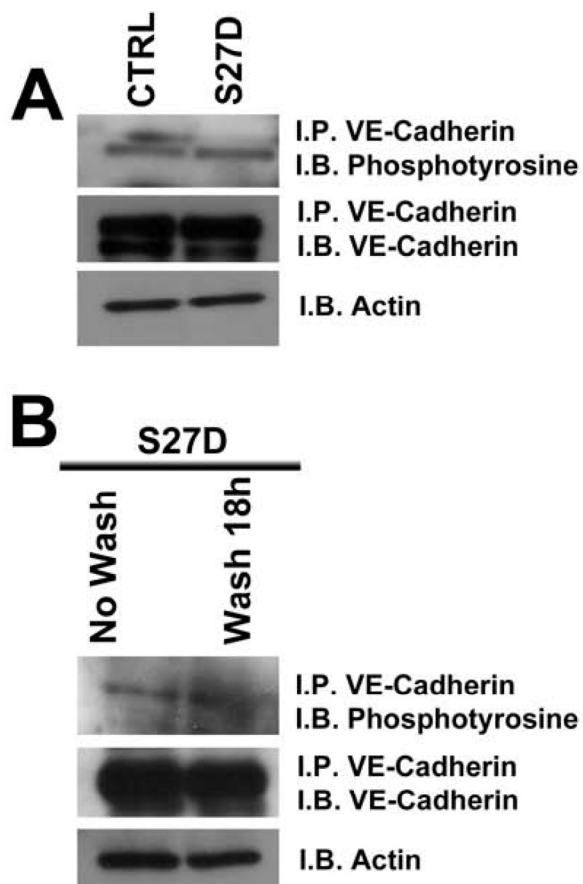

**Supplemental figure 3.** *S27D* does not affect the phosphorylation levels of VE-cadherin. HUVECs were incubated with *S27D* for 30 minutes (**A**) or for 4.5h and 4.5h followed by wash out (**B**). VE-cadherin was immunoprecipitated (I.P.) and samples were analyzed by Western blotting with a phosphotyrosine-specific Ab (PY20) (I.B.). Results showed that *S27D* did not affect tyrosine phosphorylation levels of VE-cadherin. Actin was included as a loading control.
